# Supplementary material for: Aldehyde Dehydrogenase 1B1 Is Implicated in DNA Damage Response in Human Colorectal Adenocarcinoma
Source: MDPI journal article supplement (doi:10.3390/cells11132017), 2022-06-24
Supplement: s1 [file s1]

## Supplementary Materials & Methods

**Table S1.** List of genes included in the RT<sup>2</sup> Profiler PCR Array for Human DNA Damage Signaling Pathway: Cat. no. 330231 PAHS-029ZA (Qiagen).

| Position | UniGene   | Genebank  | Symbol  | Description                                                                                                                     |
|----------|-----------|-----------|---------|---------------------------------------------------------------------------------------------------------------------------------|
| A01      | Hs.431048 | NM_005157 | ABL1    | C-abl oncogene 1, non-receptor tyrosine kinase                                                                                  |
| A02      | Hs.73722  | NM_080649 | APEX1   | APEX nuclease (multifunctional DNA repair enzyme) 1                                                                             |
| A03      | Hs.367437 | NM_000051 | ATM     | Ataxia telangiectasia mutated                                                                                                   |
| A04      | Hs.271791 | NM_001184 | ATR     | Ataxia telangiectasia and Rad3 related                                                                                          |
| A05      | Hs.694840 | NM_032166 | ATRIP   | ATR interacting protein                                                                                                         |
| A06      | Hs.533526 | NM_000489 | ATRX    | Alpha thalassemia/mental retardation syndrome X-linked                                                                          |
| A07      | Hs.591642 | NM_000465 | BARD1   | BRCA1 associated RING domain 1                                                                                                  |
| A08      | Hs.624291 | NM_004324 | BAX     | BCL2-associated X protein                                                                                                       |
| A09      | Hs.467020 | NM_014417 | BBC3    | BCL2 binding component 3                                                                                                        |
| A10      | Hs.716515 | NM_000057 | BLM     | Bloom syndrome, RecQ helicase-like                                                                                              |
| A11      | Hs.194143 | NM_007294 | BRCA1   | Breast cancer 1, early onset                                                                                                    |
| A12      | Hs.532799 | NM_032043 | BRIP1   | BRCA1 interacting protein C-terminal helicase 1                                                                                 |
| B01      | Hs.437705 | NM_001789 | CDC25A  | Cell division cycle 25 homolog A (S. pombe)                                                                                     |
| B02      | Hs.656    | NM_001790 | CDC25C  | Cell division cycle 25 homolog C (S. pombe)                                                                                     |
| B03      | Hs.184298 | NM_001799 | CDK7    | Cyclin-dependent kinase 7                                                                                                       |
| B04      | Hs.370771 | NM_000389 | CDKN1A  | Cyclin-dependent kinase inhibitor 1A (p21, Cip1)                                                                                |
| B05      | Hs.24529  | NM_001274 | CHEK1   | CHK1 checkpoint homolog (S. pombe)                                                                                              |
| B06      | Hs.291363 | NM_007194 | CHEK2   | CHK2 checkpoint homolog (S. pombe)                                                                                              |
| B07      | Hs.135471 | NM_006384 | CIB1    | Calcium and integrin binding 1 (calmyrin)                                                                                       |
| B08      | Hs.151573 | NM_004075 | CRY1    | Cryptochrome 1 (photolyase-like)                                                                                                |
| B09      | Hs.82201  | NM_001896 | CSNK2A2 | Casein kinase 2, alpha prime polypeptide                                                                                        |
| B10      | Hs.290758 | NM_001923 | DDB1    | Damage-specific DNA binding protein 1, 127kDa                                                                                   |
| B11      | Hs.700338 | NM_000107 | DDB2    | Damage-specific DNA binding protein 2, 48kDa                                                                                    |
| B12      | Hs.728989 | NM_004083 | DDIT3   | DNA-damage-inducible transcript 3                                                                                               |
| C01      | Hs.435981 | NM_001983 | ERCC1   | Excision repair cross-complementing rodent repair deficiency, complementation group 1 (includes overlapping antisense sequence) |
| C02      | Hs.487294 | NM_000400 | ERCC2   | Excision repair cross-complementing rodent repair deficiency, complementation group 2                                           |
| C03      | Hs.498248 | NM_130398 | EXO1    | Exonuclease 1                                                                                                                   |
| C04      | Hs.567267 | NM_000135 | FANCA   | Fanconi anemia, complementation group A                                                                                         |
| C05      | Hs.208388 | NM_033084 | FANCD2  | Fanconi anemia, complementation group D2                                                                                        |
| C06      | Hs.591084 | NM_004629 | FANCG   | Fanconi anemia, complementation group G                                                                                         |
| C07      | Hs.409065 | NM_004111 | FEN1    | Flap structure-specific endonuclease 1                                                                                          |
| C08      | Hs.80409  | NM_001924 | GADD45A | Growth arrest and DNA-damage-inducible, alpha                                                                                   |
| C09      | Hs.9701   | NM_006705 | GADD45G | Growth arrest and DNA-damage-inducible, gamma                                                                                   |
| C10      | Hs.477879 | NM_002105 | H2AFX   | H2A histone family, member X                                                                                                    |
| C11      | Hs.152983 | NM_004507 | HUS1    | HUS1 checkpoint homolog (S. pombe)                                                                                              |
| C12      | Hs.1770   | NM_000234 | LIG1    | Ligase I, DNA, ATP-dependent                                                                                                    |
| D01      | Hs.432642 | NM_002969 | MAPK12  | Mitogen-activated protein kinase 12                                                                                             |
| D02      | Hs.35947  | NM_003925 | MBD4    | Methyl-CpG binding domain protein 4                                                                                             |
| D03      | Hs.709634 | NM_024596 | MCPH1   | Microcephalin 1                                                                                                                 |
| D04      | Hs.653495 | NM_014641 | MDC1    | Mediator of DNA-damage checkpoint 1                                                                                             |
| D05      | Hs.195364 | NM_000249 | MLH1    | MutL homolog 1, colon cancer, nonpolyposis type 2 (E. coli)                                                                     |
| D06      | Hs.436650 | NM_014381 | MLH3    | MutL homolog 3 (E. coli)                                                                                                        |
| D07      | Hs.459596 | NM_002434 | MPG     | N-methylpurine-DNA glycosylase                                                                                                  |
| D08      | Hs.192649 | NM_005590 | MRE11A  | MRE11 meiotic recombination 11 homolog A (S. cerevisiae)                                                                        |
| D09      | Hs.597656 | NM_000251 | MSH2    | MutS homolog 2, colon cancer, nonpolyposis type 1 (E. coli)                                                                     |
| D10      | Hs.280987 | NM_002439 | MSH3    | MutS homolog 3 (E. coli)                                                                                                        |
| D11      | Hs.492208 | NM_002485 | NBN     | Nibrin                                                                                                                          |
| D12      | Hs.66196  | NM_002528 | NTHL1   | Nth endonuclease III-like 1 (E. coli)                                                                                           |
| E01      | Hs.380271 | NM_002542 | OGG1    | 8-oxoguanine DNA glycosylase                                                                                                    |

|     |           |           |          |                                                                        |
|-----|-----------|-----------|----------|------------------------------------------------------------------------|
| E02 | Hs.177766 | NM_001618 | PARP1    | Poly (ADP-ribose) polymerase 1                                         |
| E03 | Hs.728886 | NM_182649 | PCNA     | Proliferating cell nuclear antigen                                     |
| E04 | Hs.111749 | NM_000534 | PMS1     | PMS1 postmeiotic segregation increased 1 (S. cerevisiae)               |
| E05 | Hs.632637 | NM_000535 | PMS2     | PMS2 postmeiotic segregation increased 2 (S. cerevisiae)               |
| E06 | Hs.78016  | NM_007254 | PNKP     | Polynucleotide kinase 3'-phosphatase                                   |
| E07 | Hs.591184 | NM_003620 | PPM1D    | Protein phosphatase, Mg2+/Mn2+ dependent, 1D                           |
| E08 | Hs.631593 | NM_014330 | PPP1R15A | Protein phosphatase 1, regulatory (inhibitor) subunit 15A              |
| E09 | Hs.491682 | NM_006904 | PRKDC    | Protein kinase, DNA-activated, catalytic polypeptide                   |
| E10 | Hs.531879 | NM_002853 | RAD1     | RAD1 homolog (S. pombe)                                                |
| E11 | Hs.16184  | NM_002873 | RAD17    | RAD17 homolog (S. pombe)                                               |
| E12 | Hs.375684 | NM_020165 | RAD18    | RAD18 homolog (S. cerevisiae)                                          |
| F01 | Hs.81848  | NM_006265 | RAD21    | RAD21 homolog (S. pombe)                                               |
| F02 | Hs.655835 | NM_005732 | RAD50    | RAD50 homolog (S. cerevisiae)                                          |
| F03 | Hs.631709 | NM_002875 | RAD51    | RAD51 homolog (S. cerevisiae)                                          |
| F04 | Hs.172587 | NM_133509 | RAD51B   | RAD51 homolog B (S. cerevisiae)                                        |
| F05 | Hs.655354 | NM_004584 | RAD9A    | RAD9 homolog A (S. pombe)                                              |
| F06 | Hs.546282 | NM_002894 | RBBP8    | Retinoblastoma binding protein 8                                       |
| F07 | Hs.443077 | NM_016316 | REV1     | REV1 homolog (S. cerevisiae)                                           |
| F08 | Hs.660132 | NM_152617 | RNF168   | Ring finger protein 168                                                |
| F09 | Hs.485278 | NM_183078 | RNF8     | Ring finger protein 8                                                  |
| F10 | Hs.461925 | NM_002945 | RPA1     | Replication protein A1, 70kDa                                          |
| F11 | Hs.369779 | NM_012238 | SIRT1    | Sirtuin 1                                                              |
| F12 | Hs.211602 | NM_006306 | SMC1A    | Structural maintenance of chromosomes 1A                               |
| G01 | Hs.81424  | NM_003352 | SUMO1    | SMT3 suppressor of mif two 3 homolog 1 (S. cerevisiae)                 |
| G02 | Hs.53454  | NM_007027 | TOPBP1   | Topoisomerase (DNA) II binding protein 1                               |
| G03 | Hs.654481 | NM_000546 | TP53     | Tumor protein p53                                                      |
| G04 | Hs.440968 | NM_005657 | TP53BP1  | Tumor protein p53 binding protein 1                                    |
| G05 | Hs.697294 | NM_005427 | TP73     | Tumor protein p73                                                      |
| G06 | Hs.191334 | NM_003362 | UNG      | Uracil-DNA glycosylase                                                 |
| G07 | Hs.654364 | NM_000380 | XPA      | Xeroderma pigmentosum, complementation group A                         |
| G08 | Hs.475538 | NM_004628 | XPC      | Xeroderma pigmentosum, complementation group C                         |
| G09 | Hs.98493  | NM_006297 | XRCC1    | X-ray repair complementing defective repair in Chinese hamster cells 1 |
| G10 | Hs.647093 | NM_005431 | XRCC2    | X-ray repair complementing defective repair in Chinese hamster cells 2 |
| G11 | Hs.592325 | NM_005432 | XRCC3    | X-ray repair complementing defective repair in Chinese hamster cells 3 |
| G12 | Hs.292493 | NM_001469 | XRCC6    | X-ray repair complementing defective repair in Chinese hamster cells 6 |
| H01 | Hs.520640 | NM_001101 | ACTB     | Actin, beta                                                            |
| H02 | Hs.534255 | NM_004048 | B2M      | Beta-2-microglobulin                                                   |
| H03 | Hs.592355 | NM_002046 | GAPDH    | Glyceraldehyde-3-phosphate dehydrogenase                               |
| H04 | Hs.412707 | NM_000194 | HPRT1    | Hypoxanthine phosphoribosyltransferase 1                               |
| H05 | Hs.546285 | NM_001002 | RPLP0    | Ribosomal protein, large, P0                                           |
| H06 | N/A       | SA_00105  | HGDC     | Human Genomic DNA Contamination                                        |
| H07 | N/A       | SA_00104  | RTC      | Reverse Transcription Control                                          |
| H08 | N/A       | SA_00104  | RTC      | Reverse Transcription Control                                          |
| H09 | N/A       | SA_00104  | RTC      | Reverse Transcription Control                                          |
| H10 | N/A       | SA_00103  | RTC      | Positive PCR Control                                                   |
| H11 | N/A       | SA_00103  | RTC      | Positive PCR Control                                                   |
| H12 | N/A       | SA_00103  | RTC      | Positive PCR Control                                                   |

**Table S2.** Correlation of mRNA levels between ALDH1B1 and DDS-related genes.

| Gene Name | Rho    | P-value       | Statistical significance |
|-----------|--------|---------------|--------------------------|
| ABL1      | 0.284  | 0.00000000414 | ****                     |
| APEX1     | 0.124  | 0.004224      | **                       |
| ATM       | -0.051 | 0.243874      | -                        |
| ATR       | 0.045  | 0.296027      | -                        |
| ATRIP     | 0.073  | 0.090802      | -                        |
| ATRX      | 0.011  | 0.802513      | -                        |

|          |        |              |      |
|----------|--------|--------------|------|
| BARD1    | -0.075 | 0.085043     | -    |
| BAX      | 0.074  | 0.089518     | -    |
| BBC3     | 0.049  | 0.255766     | -    |
| BLM      | -0.053 | 0.226768     | -    |
| BRCA1    | -0.035 | 0.415595     | -    |
| BRIP1    | -0.043 | 0.324472     | -    |
| CDC25A   | 0.094  | 0.029881     | *    |
| CDC25C   | -0.022 | 0.610128     | -    |
| CDK7     | 0.021  | 0.626746     | -    |
| CDKN1A   | -0.121 | 0.00531      | **   |
| CHEK1    | 0.003  | 0.935879     | -    |
| CHEK2    | 0.033  | 0.447983     | -    |
| CIB1     | -0.041 | 0.343212     | -    |
| CRY1     | -0.218 | 0.000000387  | **** |
| CSNK2A2  | 0.110  | 0.010848     | *    |
| DDB1     | -0.031 | 0.472816     | -    |
| DDB2     | 0.016  | 0.718415     | -    |
| DDIT3    | -0.009 | 0.838622     | -    |
| ERCC1    | 0.031  | 0.471        | -    |
| ERCC2    | 0.053  | 0.223188     | -    |
| EXO1     | -0.123 | 0.004595     | **   |
| FANCA    | -0.086 | 0.047241     | *    |
| FANCD2   | -0.103 | 0.017635     | *    |
| FANCG    | 0.085  | 0.049217     | *    |
| FEN1     | 0.074  | 0.086874     | -    |
| GADD45A  | -0.062 | 0.150554     | -    |
| GADD45G  | 0.170  | 0.000084     | **** |
| H2AX     | -0.009 | 0.843025     | -    |
| HUS1     | 0.050  | 0.252429     | -    |
| LIG1     | 0.007  | 0.869712     | -    |
| MAPK12   | -0.208 | 0.00000128   | **** |
| MBD4     | 0.007  | 0.880751     | -    |
| MCPH1    | -0.042 | 0.339783     | -    |
| MDC1     | -0.069 | 0.111929     | -    |
| MLH1     | 0.153  | 0.000407     | ***  |
| MLH3     | 0.035  | 0.415834     | -    |
| MPG      | 0.036  | 0.411011     | -    |
| MRE11    | 0.041  | 0.340112     | -    |
| MSH2     | -0.041 | 0.349813     | -    |
| MSH3     | 0.011  | 0.793598     | -    |
| NBN      | -0.119 | 0.00584      | **   |
| NTHL1    | 0.237  | 0.0000000325 | **** |
| OGG1     | 0.155  | 0.000341     | ***  |
| PARP1    | -0.081 | 0.063085     | -    |
| PCNA     | 0.109  | 0.012343     | *    |
| PMS1     | -0.012 | 0.791036     | -    |
| PMS2     | -0.008 | 0.850413     | -    |
| PNKP     | 0.021  | 0.633336     | -    |
| PPM1D    | -0.018 | 0.681547     | -    |
| PPP1R15A | -0.118 | 0.006495     | **   |
| PRKDC    | -0.036 | 0.411331     | -    |
| RAD1     | 0.018  | 0.674291     | -    |
| RAD17    | -0.073 | 0.094466     | -    |
| RAD18    | -0.076 | 0.078201     | -    |
| RAD21    | -0.179 | 0.0000329    | **** |
| RAD50    | 0.090  | 0.03874      | *    |
| RAD51    | -0.018 | 0.683691     | -    |
| RAD51B   | 0.031  | 0.48219      | -    |
| RAD9A    | -0.114 | 0.008724     | **   |
| RBBP8    | -0.208 | 0.00000132   | **** |
| REV1     | 0.015  | 0.736747     | -    |
| RNF168   | -0.067 | 0.124754     | -    |
| RNF8     | 0.033  | 0.449283     | -    |
| RPA1     | -0.052 | 0.234589     | -    |
| SIRT1    | -0.090 | 0.037457     | *    |

|         |        |            |      |
|---------|--------|------------|------|
| SMC1A   | 0.062  | 0.152291   | -    |
| SUMO1   | 0.038  | 0.377362   | -    |
| TOPBP1  | -0.091 | 0.035844   | *    |
| TP53    | 0.143  | 0.000965   | ***  |
| TP53BP1 | 0.129  | 0.002863   | **   |
| TP73    | -0.204 | 0.00000213 | **** |
| UNG     | 0.121  | 0.005064   | **   |
| XPA     | 0.152  | 0.000441   | ***  |
| XPC     | 0.062  | 0.155427   | -    |
| XRCC1   | 0.113  | 0.009416   | **   |
| XRCC2   | -0.043 | 0.32225    | -    |
| XRCC3   | -0.044 | 0.306193   | -    |
| XRCC6   | 0.003  | 0.939439   | -    |

\* $p < 0.05$ , \*\* $p < 0.01$ , \*\*\* $p < 0.001$ , \*\*\*\* $p < 0.0001$ .

**Table S3.** Correlation of protein levels between ALDH1B1 and DDS-related proteins.

| Protein Name | Rho    | P-value       | Statistical significance |
|--------------|--------|---------------|--------------------------|
| APEX1        | 0.615  | 0.00000000274 | ****                     |
| ATM          | 0.007  | 0.953844      | -                        |
| ATRAX        | 0.187  | 0.104299      | -                        |
| BAX          | 0.464  | 0.0000214     | ****                     |
| CDK7         | 0.002  | 0.989514      | -                        |
| CHEK2        | -0.004 | 0.972997      | -                        |
| CIB1         | 0.330  | 0.003407      | **                       |
| CSNK2A2      | 0.324  | 0.003993      | **                       |
| DDB1         | 0.556  | 0.000000149   | ****                     |
| DDB2         | 0.066  | 0.570772      | -                        |
| ERCC2        | -0.074 | 0.519907      | -                        |
| FANCD2       | -0.090 | 0.436974      | -                        |
| FEN1         | 0.420  | 0.000143      | ***                      |
| H2AX         | 0.288  | 0.011211      | *                        |
| LIG1         | 0.158  | 0.169384      | -                        |
| MDC1         | 0.077  | 0.506527      | -                        |
| MLH1         | 0.116  | 0.313628      | -                        |
| MPG          | 0.445  | 0.0000506     | ****                     |
| MRE11        | 0.604  | 0.00000000627 | ****                     |
| MSH2         | 0.234  | 0.040617      | *                        |
| MSH3         | -0.223 | 0.051539      | -                        |
| NBN          | 0.314  | 0.005351      | **                       |
| PARP1        | 0.286  | 0.011822      | *                        |
| PCNA         | 0.337  | 0.002693      | **                       |
| PNKP         | 0.310  | 0.00602       | **                       |
| PRKDC        | 0.584  | 0.0000000247  | ****                     |
| RAD21        | 0.529  | 0.000000765   | ****                     |
| RAD50        | 0.532  | 0.000000641   | ****                     |
| RPA1         | 0.418  | 0.000154      | ***                      |
| SMC1A        | 0.410  | 0.000209      | ***                      |
| SUMO1        | 0.066  | 0.571117      | -                        |
| TP53         | -0.022 | 0.846748      | -                        |
| TP53BP1      | 0.351  | 0.001744      | **                       |
| UNG          | 0.275  | 0.015645      | *                        |
| XPC          | 0.296  | 0.009038      | **                       |
| XRCC1        | 0.395  | 0.00038       | ***                      |
| XRCC6        | 0.547  | 0.000000265   | ****                     |

\* $p < 0.05$ , \*\* $p < 0.01$ , \*\*\* $p < 0.001$ , \*\*\*\* $p < 0.0001$ .
